# Supplementary material for: Does Colonic Diverticulosis Raise the Risk of Colorectal Adenoma in Patients with Colorectal Cancer?
Source: Gastroenterol Res Pract. 2019 May 20;2019:8901026. doi: 10.1155/2019/8901026 (PMC6545780; doi:10.1155/2019/8901026)
Supplement: Supplementary Materials — This file contains data of the patients' characteristics, presence of colonic diverticulosis colonoscopically detected and barium enema-detected diverticulosis, and presence of synchronous and metachronous polyps. [file 8901026.f1.xlsx]

## Sheet: data
group (1=patients, 2=control)	sex(1:male,2:female)	age	presence of diverticulum(1:presence)	presence of diverticulum (colonoscopy)	presence of diverticulum (BE)	number of diverticulum( single:1, multiple: 2)	location of diverticulum(Right:1,Left:2,Both:3)	location of colon polyp (cecum/Ascending:1,transverse:2, Descending:3,Sigmoid:4,Rectum:5)	location of colon cancer (cecum/Ascending:1,transverse:2, Descending:3,Sigmoid:4,Rectum:5)	height (cm)	weight (kg)	BMI	Smoking (1:current smoker)	alcohol (1:alcoholics)	T stage	N stage	M stage	stage3/4	colon Polyp	polyp size	advanced polyp	number of polyps	multiple polyp(3이상)	location of colon polyp (cecum/Ascending:1,transverse:2, Descending:3,Sigmoid:4,Rectum:5)	Survival (1:none)	Recurrence (0:no,1:yes)	follow up (month)	f/u CFS(1st) : colon polyp	size(cm)	f/u CFS(2nd) : colon polyp	colon Polyp+missing polyp	f/u CFS(3rd) : colon polyp
0	1	67	0	0	0	0	0	5	1	127	66	40.9	0	1	3	0	0	1	1	1	1	1	0	5	0	0	85	0	0	0	0	NA
0	2	73	0	0	0	0	0	1	4	143	73	35.7	0	0	4	2	0	1	1	1	1	6	1	1	0	0	73	NA	NA	NA	1	NA
0	1	62	0	1	0	0	0	1	5	139	66	34.2	1	1	3	0	0	0	1	1	1	1	0	1	0	0	76	0	0	0	1	0
1	2	77	1	0	1	2	3	2	5	150	75	33.3	0	0	2	0	0	0	1	0.6	0	2	0	6	0	0	109	0	0	NA	1	0
0	2	68	0	0	0	0	0	0	5	147	68	31.5	0	0	2	0	0	0	0	0	NA	0	NA	0	0	0	82	0	0	0	0	1
1	1	61	1	0	1	1	1	1	5	174	92	30.4	0	0	3	0	0	1	1	0.7	0	2	0	1	0	0	140	1	1	1	1	1
0	1	67	0	0	0	0	0	0	5	170	88	30.4	1	0	2	0	0	0	0	0	NA	0	NA	0	0	0	98	0	0	0	0	NA
0	2	67	0	0	0	0	0	0	5	174	92	30.4	0	0	3	2	0	1	0	0	NA	0	NA	0	0	0	90	0	0	1	1	NA
0	2	42	0	0	0	0	0	1	5	152	70	30.3	0	0	4	1	1	1	1	1	1	1	0	1	0	0	25	NA	NA	NA	1	NA
0	2	61	0	0	0	0	0	1	5	149	66	29.7	0	0	1	0	0	0	1	0.8	0	1	0	1	0	0	144	0	0	0	1	1
1	1	51	1	1	1	2	1	2	5	169	83	29.1	1	0	1	0	0	0	1	0.8	0	4	1	6	0	0	102	0	0	0	1	1
0	1	59	0	0	0	0	0	2	3	164	78	29	0	1	2	1	0	0	1	1.4	1	5	1	2	0	0	103	0	0	0	0	NA
1	2	65	1	0	1	2	1	2	4	156	70	28.8	0	0	2	0	0	0	1	0.7	0	1	0	5	0	0	59	1	0.3	0	0	NA
0	2	88	0	0	0	0	0	2	5	142	58	28.8	0	0	2	0	0	0	1	0.5	0	5	1	2	0	0	41	0	0	0	1	0
0	2	77	0	0	0	0	0	0	5	142	58	28.8	0	0	3	1	1	1	0	0	NA	0	NA	0	0	0	13	NA	NA	NA	1	NA
0	2	70	0	0	0	0	0	0	1	151	65	28.5	0	0	3	0	0	1	0	0	NA	0	NA	0	0	0	72	0	0	0	0	0
0	2	68	0	0	0	0	0	0	5	161	74	28.5	0	0	2	0	0	0	0	0	NA	0	NA	0	0	0	112	0	0	1	1	1
1	1	54	1	0	1	1	1	2	4	170	82	28.4	0	0	4	2	1	1	1	0.5	0	1	0	5	0	1	119	0	0	0	1	1
0	1	59	0	0	0	0	0	1	5	173	85	28.4	0	0	3	2	0	1	1	1	1	1	0	1	0	0	120	0	0	0	1	1
1	2	48	1	1	0	1	1	0	4	154	67	28.3	0	0	2	0	0	0	0	0	NA	0	NA	0	0	0	95	0	0	0	1	1
0	2	42	0	0	0	0	0	1	5	154	67	28.3	0	1	1	0	0	0	1	1.5	1	3	1	1	0	0	99	0	0	0	1	1
0	1	59	0	0	0	0	0	2	5	168	80	28.3	0	0	1	0	0	0	1	1	1	8	1	2	0	0	101	0	0	0	1	1
0	2	45	0	0	0	0	0	0	5	151	64	28.1	0	0	3	1	0	1	0	0	NA	0	NA	0	0	0	110	0	0	1	1	NA
0	2	64	0	0	0	0	0	5	5	150	63	28	0	0	2	0	0	0	1	1	1	3	1	5	0	0	56	0	0	0	1	NA
0	2	43	0	0	0	0	0	0	5	153	65	27.8	1	1	2	0	0	0	0	0	NA	0	NA	0	0	0	88	0	0	0	0	0
1	1	64	1	0	1	1	2	0	5	172	82	27.7	0	0	3	1	0	1	0	0	NA	0	NA	0	0	0	93	0	0	0	1	0
1	2	65	1	1	1	2	1	0	1	152	64	27.7	0	0	3	0	0	1	0	0	NA	0	NA	0	0	0	85	0	0	0	0	0
1	1	66	1	0	1	2	1	2	5	157	68	27.6	0	0	2	0	0	0	1	0.7	0	1	0	4	0	0	81	0	0	0	1	1
0	2	77	0	0	0	0	0	0	5	150	62	27.6	0	0	3	1	0	1	0	0	NA	0	NA	0	0	0	111	0	0	0	1	1
0	2	48	0	0	0	0	0	0	5	158	69	27.6	0	0	2	0	0	0	0	0	NA	0	NA	0	0	0	89	0	0	0	0	NA
0	1	57	0	0	0	0	0	0	4	167	77	27.6	1	1	3	2	0	1	0	0	NA	0	NA	0	0	0	145	0	0	0	0	1
1	1	67	1	0	1	2	1	1	5	163	73	27.5	0	0	1	1	0	0	1	0.8	0	1	0	3	0	0	51	0	0	0	1	NA
1	2	55	1	1	1	1	3	1	1	164	74	27.5	0	0	1	0	0	0	1	0.3	0	3	1	1	0	0	124	0	0	1	0	1
1	2	63	1	0	1	2	3	2	4	154	65	27.4	0	0	3	0	0	1	1	1	1	7	1	6	0	0	48	0	0	0	1	NA
1	1	47	1	0	1	1	1	2	4	172	81	27.4	1	1	3	0	0	1	1	0.6	0	1	0	4	0	0	48	0	0	0	1	NA
1	1	85	1	0	1	2	1	1	5	147	59	27.3	0	1	3	1	0	1	1	1	1	2	0	3	0	0	82	NA	NA	NA	1	1
0	1	58	0	0	0	0	0	1	5	165	74	27.2	1	1	1	0	0	0	1	0.3	0	9	1	1	0	0	113	0	0	1	1	1
0	1	64	0	0	0	0	0	0	4	163	72	27.1	0	0	3	1	0	1	0	0	NA	0	NA	0	0	0	109	NA	NA	NA	0	0
1	1	55	1	0	1	2	1	0	5	169	77	27	0	1	3	0	0	1	0	0	NA	0	NA	0	0	0	61	0	0	0	1	NA
1	1	62	1	0	1	1	1	1	4	160	69	27	0	1	2	0	0	0	1	2.5	1	2	0	2	0	0	122	0	0	0	1	0
0	1	47	0	0	0	0	0	0	1	169	77	27	1	1	3	1	0	1	0	0	NA	0	NA	0	0	0	142	0	0	0	0	0
0	1	76	0	0	0	0	0	4	4	167	75	26.9	0	0	3	0	0	1	1	1.3	1	5	1	4	0	0	38	1	1	0	0	NA
0	2	58	0	0	0	0	0	0	5	151	61	26.8	1	0	4	2	1	1	0	0	NA	0	NA	0	0	1	152	0	0	0	1	1
0	2	60	0	0	0	0	0	2	4	147	58	26.8	0	0	2	0	0	0	1	1.2	1	3	1	2	0	0	101	0	0	0	0	0
0	1	64	0	0	0	0	0	3	5	174	81	26.8	0	0	3	1	0	1	1	0.5	0	1	0	3	0	0	38	1	0.4	0	0	NA
0	2	74	0	0	0	0	0	0	5	160	68	26.6	0	0	2	0	0	0	0	0	NA	0	NA	0	0	0	83	0	0	0	0	NA
1	1	64	1	0	1	2	1	0	5	168	74	26.2	1	1	1	1	0	0	0	0	NA	0	NA	0	0	0	119	0	0	0	1	0
0	1	68	0	0	0	0	0	0	5	160	67	26.2	0	1	3	0	0	1	0	0	NA	0	NA	0	0	0	44	0	0	NA	0	0
1	2	67	1	0	1	2	2	0	1	153	61	26.1	0	0	2	0	0	0	0	0	NA	0	NA	0	0	0	72	0	0	0	0	NA
1	2	55	1	0	1	1	1	1	5	149	58	26.1	0	1	2	1	1	1	1	1	1	1	0	3	0	0	132	1	0.4	1	1	1
0	2	59	0	0	0	0	0	0	5	148	57	26	0	0	3	1	0	1	0	0	NA	0	NA	0	0	0	85	0	0	0	1	NA
0	1	52	0	0	0	0	0	0	4	168	73	25.9	0	0	0	0	0	0	0	0	NA	0	NA	0	0	0	64	0	0	0	0	NA
0	1	43	0	0	0	0	0	0	5	161	67	25.8	0	0	3	0	0	0	0	0	NA	0	NA	0	0	0	71	0	0	0	0	NA
0	1	68	0	0	0	0	0	0	5	166	71	25.8	0	0	2	0	0	0	0	0	NA	0	NA	0	0	0	146	0	0	0	0	0
0	1	64	0	0	0	0	0	0	5	165	70	25.7	1	0	3	0	0	1	0	0	NA	0	NA	0	0	0	41	NA	NA	NA	1	1
1	1	63	1	1	1	2	1	1	1	170	74	25.6	0	1	3	0	0	1	1	0.3	0	1	0	2	0	0	115	1	1	0	1	0
1	1	48	1	0	1	2	1	1	5	178	81	25.6	1	0	4	1	0	1	1	1.8	1	3	1	3	0	1	86	NA	NA	NA	1	NA
1	1	75	1	1	1	2	1	2	3	161	66	25.5	0	0	3	1	0	1	1	0.6	0	2	0	6	0	0	72	0	0	NA	1	NA
0	1	52	0	0	0	0	0	0	5	156	62	25.5	0	0	3	1	0	1	0	0	NA	0	NA	0	0	0	58	0	0	0	1	NA
0	2	64	0	0	0	0	0	4	1	156	62	25.5	0	0	3	0	0	1	1	0.3	0	1	0	4	0	0	62	0	0	0	0	NA
1	1	73	1	0	1	2	1	2	4	160	65	25.4	0	1	3	0	0	1	1	0.6	0	4	1	4	0	0	136	0	0	1	1	1
0	1	69	0	0	0	0	0	1	5	160	65	25.4	0	0	3	0	0	1	1	1	1	7	1	1	0	0	61	1	1	0	0	0
1	2	55	1	1	1	2	1	1	5	153	59	25.2	0	0	3	0	0	1	1	0.4	0	1	0	2	0	0	112	0	0	0	1	0
1	1	70	1	0	1	2	2	2	4	163	67	25.2	0	0	3	1	0	1	1	1.4	1	4	1	5	0	1	66	0	0	NA	1	1
0	1	55	0	0	0	0	0	5	5	163	67	25.2	0	0	3	0	0	1	1	1.7	1	1	0	5	0	0	84	0	0	0	1	0
0	2	73	0	0	0	0	0	2	5	144	52	25.1	0	0	2	0	0	0	1	2.5	1	2	0	2	0	0	154	0	0	0	1	0
0	1	59	0	0	0	0	0	0	1	167	70	25.1	1	1	2	0	0	0	0	0	NA	0	NA	0	0	0	72	0	0	0	1	1
0	1	59	0	0	0	0	0	5	5	161	65	25.1	0	1	3	1	0	1	1	1.6	1	4	1	5	0	0	110	0	0	1	1	0
0	2	74	0	0	0	0	0	0	5	152	58	25.1	0	0	4	2	0	1	0	0	NA	0	NA	0	0	0	41	0	0	NA	0	0
1	2	50	1	1	1	2	1	1	5	151	57	25	0	0	2	0	0	0	1	0.5	0	1	0	1	0	0	157	0	0	0	1	0
1	2	51	1	1	0	2	1	2	5	160	64	25	0	0	3	2	0	1	1	0.8	0	1	0	4	0	1	31	0	0	NA	1	NA
1	1	81	1	0	1	2	3	0	5	155	60	25	0	0	3	0	0	1	0	0	NA	0	NA	0	0	0	41	0	0	NA	1	1
0	1	77	0	0	0	0	0	0	4	166	69	25	0	0	3	0	0	1	0	0	NA	0	NA	0	0	0	65	0	0	0	0	0
0	1	62	0	0	0	0	0	0	5	169	71	24.9	1	1	3	2	0	1	0	0	NA	0	NA	0	0	0	148	0	0	0	1	0
0	2	48	0	0	0	0	0	4	4	154	59	24.9	0	0	3	0	0	1	1	1	1	7	1	4	0	0	89	0	0	0	0	NA
0	1	72	0	0	0	0	0	0	4	162	65	24.8	0	1	1	0	0	0	0	0	NA	0	NA	0	0	1	13	NA	NA	NA	0	NA
1	1	37	1	0	1	2	1	0	5	167	69	24.7	1	1	2	0	0	0	0	0	NA	0	NA	0	0	0	53	0	0	NA	1	0
0	2	74	0	0	0	0	0	0	5	152	57	24.7	0	0	2	0	0	0	0	0	NA	0	NA	0	0	0	84	0	0	0	0	NA
0	1	54	0	0	0	0	0	1	4	173	74	24.7	0	0	3	2	0	1	1	1	1	3	1	1	0	0	90	0	0	0	0	NA
0	1	67	0	0	0	0	0	4	4	167	69	24.7	0	0	1	0	0	0	1	0.5	0	1	0	4	0	0	154	0	0	0	0	0
0	1	67	0	0	0	0	0	0	4	173	74	24.7	0	1	2	0	0	0	0	0	NA	0	NA	0	0	0	118	0	0	0	0	1
0	2	81	0	0	0	0	0	1	4	145	52	24.7	0	0	2	2	0	1	1	1	1	1	0	1	0	1	90	0	0	NA	0	0
1	2	68	1	0	1	2	2	0	5	151	56	24.6	0	0	3	0	0	1	0	0	NA	0	NA	0	0	0	89	0	0	0	1	NA
1	2	76	1	0	1	1	1	1	5	143	50	24.5	1	0	2	0	0	0	1	1	1	1	0	1	0	0	106	NA	NA	NA	1	1
0	1	74	0	0	0	0	0	0	5	163	65	24.5	0	0	3	0	0	1	0	0	NA	0	NA	0	0	0	123	1	0.3	0	0	0
0	1	71	0	0	0	0	0	4	1	159	62	24.5	0	0	4	2	0	1	1	0.7	0	2	0	4	0	0	97	1	0.5	0	1	NA
1	1	63	1	1	0	1	1	0	5	174	74	24.4	1	1	1	0	0	0	0	0	NA	0	NA	0	0	0	161	0	0	0	1	0
0	2	50	0	0	0	0	0	0	5	150	55	24.4	0	0	1	0	0	0	0	0	NA	0	NA	0	0	0	121	0	0	0	0	0
1	1	71	1	1	1	2	2	1	5	157	60	24.3	1	0	2	0	0	0	1	0.5	0	1	0	1	1	0	8	0	0	NA	1	NA
1	1	70	1	0	1	2	1	1	5	161	63	24.3	1	1	2	0	0	0	1	0.5	0	2	0	1	0	0	96	1	0.2	1	1	1
0	1	78	0	0	0	0	0	5	5	161	63	24.3	0	1	3	1	0	1	1	0.5	0	1	0	5	0	0	19	0	0	NA	1	NA
0	1	69	0	0	0	0	0	1	5	166	67	24.3	1	0	2	2	0	1	1	0.8	0	2	0	1	0	0	12	1	1	NA	1	NA
0	2	67	0	0	0	0	0	5	2	149	54	24.3	0	0	3	0	0	1	1	0.3	0	1	0	5	0	0	62	NA	NA	NA	0	0
1	1	72	1	0	1	2	1	0	5	164	65	24.2	0	0	2	0	0	0	0	0	NA	0	NA	0	0	0	112	0	0	0	1	0
0	1	67	0	0	0	0	0	0	5	170	70	24.2	1	0	2	0	0	0	0	0	NA	0	NA	0	0	0	152	0	0	0	0	0
0	2	61	0	0	0	0	0	0	4	156	59	24.2	0	0	3	0	0	1	0	0	NA	0	NA	0	0	0	123	0	0	0	0	0
0	1	51	0	0	0	0	0	4	1	169	69	24.2	0	1	2	0	0	0	1	1.2	1	2	0	4	0	0	108	0	0	1	1	1
1	1	66	1	1	1	1	1	1	5	168	68	24.1	0	1	3	0	0	1	1	0.7	0	1	0	1	0	0	106	1	1	0	0	NA
0	1	57	0	0	0	0	0	4	5	163	64	24.1	0	0	2	0	0	0	1	0.7	0	4	1	4	0	0	143	0	0	0	1	0
1	2	62	1	1	0	2	1	2	1	154	57	24	0	0	4	1	0	1	1	0.8	0	1	0	4	0	0	99	0	0	0	1	1
0	1	68	0	0	0	0	0	1	2	158	60	24	0	0	2	1	0	0	1	0.3	0	1	0	1	0	0	43	0	0	0	0	NA
0	1	63	0	0	0	0	0	3	4	167	67	24	0	0	1	0	0	0	1	1	1	2	0	3	0	0	131	NA	NA	NA	1	0
1	1	55	1	0	1	1	1	0	5	174	72	23.8	0	1	2	0	0	0	0	0	NA	0	NA	0	0	0	150	1	1	0	0	0
0	1	45	0	0	0	0	0	0	5	172	70	23.7	1	0	3	1	1	1	0	0	NA	0	NA	0	0	0	18	0	0	0	1	NA
0	2	67	0	0	0	0	0	1	4	148	52	23.7	0	0	3	1	0	1	1	1.8	1	5	1	1	0	0	42	0	0	NA	0	0
0	2	77	0	0	0	0	0	0	5	154	56	23.6	0	0	3	0	0	1	0	0	NA	0	NA	0	0	0	93	0	0	0	0	NA
0	1	71	0	0	0	0	0	0	5	162	62	23.6	1	1	2	0	0	0	0	0	NA	0	NA	0	0	0	146	0	0	1	1	1
1	1	73	1	0	1	1	1	1	1	169	67	23.5	0	0	3	1	0	1	1	0.4	0	1	0	1	0	0	149	0	0	0	0	0
1	1	67	1	0	1	1	2	2	1	168	66	23.4	1	0	1	0	0	0	1	1.4	1	5	1	4	0	0	125	0	0	1	0	NA
0	1	75	0	0	0	0	0	1	2	160	60	23.4	0	0	3	0	0	1	1	0.5	0	2	0	1	0	0	36	NA	NA	NA	0	NA
0	2	55	0	0	0	0	0	1	4	151	53	23.2	0	0	3	1	0	1	1	1	1	1	0	1	0	1	113	0	0	NA	0	0
1	1	57	1	0	1	1	1	1	5	169	66	23.1	0	0	2	0	0	0	1	1	1	3	1	1	0	0	15	0	0	0	1	NA
0	2	67	0	0	0	0	0	0	1	150	52	23.1	0	0	3	1	0	1	0	0	NA	0	NA	0	0	0	74	0	0	0	1	0
1	1	73	1	0	1	2	1	0	5	167	64	22.9	0	0	4	0	0	1	0	0	NA	0	NA	0	1	0	60	NA	NA	NA	0	0
0	1	77	0	0	0	0	0	0	5	167	64	22.9	0	0	2	0	0	0	0	0	NA	0	NA	0	0	0	30	0	0	0	0	NA
0	1	66	0	0	0	0	0	1	5	171	67	22.9	1	0	1	0	1	0	1	0.2	0	2	0	1	0	0	1	NA	NA	NA	0	NA
0	1	65	0	0	0	0	0	5	1	162	60	22.9	0	0	3	1	0	1	1	0.8	0	2	0	5	0	1	18	NA	NA	NA	0	NA
0	2	34	0	0	0	0	0	0	5	165	62	22.8	0	0	3	1	0	1	0	0	NA	0	NA	0	0	0	94	0	0	0	1	0
0	2	58	0	0	0	0	0	0	5	151	52	22.8	0	0	3	0	0	1	0	0	NA	0	NA	0	0	0	137	0	0	0	0	0
0	1	78	0	0	0	0	0	4	5	160	58	22.7	0	0	2	1	0	0	1	0.5	0	2	0	4	0	0	35	0	0	0	1	NA
1	1	76	1	0	1	1	2	1	4	167	63	22.6	0	0	1	0	0	0	1	1	1	4	1	1	0	0	135	1	0.6	1	1	1
1	1	52	1	0	1	1	3	0	5	159	57	22.5	1	1	4	1	0	1	0	0	NA	0	NA	0	0	0	73	0	0	0	1	NA
0	2	62	0	0	0	0	0	0	4	152	52	22.5	0	0	2	0	0	0	0	0	NA	0	NA	0	0	0	26	0	0	0	0	NA
0	1	52	0	0	0	0	0	0	5	173	67	22.4	1	1	3	1	0	1	0	0	NA	0	NA	0	0	0	130	0	0	0	1	0
0	1	56	0	0	0	0	0	1	4	169	64	22.4	0	1	3	0	0	1	1	0.3	0	1	0	1	0	0	148	0	0	0	0	1
0	1	62	0	0	0	0	0	3	4	173	67	22.4	0	1	3	0	0	1	1	1	1	>10	1	3	0	0	112	0	0	1	1	1
0	2	52	0	0	0	0	0	0	5	156	54	22.2	0	0	3	1	0	1	0	0	NA	0	NA	0	0	0	138	0	0	0	1	0
0	1	75	0	0	0	0	0	3	4	150	50	22.2	0	0	2	0	0	0	1	0.6	0	1	0	3	0	0	118	0	0	0	0	NA
0	1	58	0	0	0	0	0	0	4	170	64.3	22.2	0	0	2	0	0	0	0	0	NA	0	NA	0	0	0	107	0	0	0	0	1
1	1	80	1	0	1	2	1	0	4	173	66	22.1	0	0	3	1	0	1	0	0	NA	0	NA	0	0	1	95	0	0	NA	1	1
0	2	65	0	0	0	0	0	0	5	152	51	22.1	0	0	1	0	0	0	0	0	NA	0	NA	0	0	0	95	0	0	0	0	NA
1	1	73	1	1	1	1	1	2	5	158	55	22	0	0	1	0	0	0	1	1	1	1	0	5	0	0	59	1	1	0	1	0
0	2	62	0	0	0	0	0	0	4	146	47	22	0	0	3	1	0	1	0	0	NA	0	NA	0	0	0	93	0	0	0	0	0
0	2	63	0	0	0	0	0	0	2	148	48	21.9	0	0	1	0	0	0	0	0	NA	0	NA	0	0	0	71	NA	NA	NA	0	0
1	1	71	1	0	1	1	1	1	5	159	55	21.8	0	0	1	0	0	0	1	0.3	0	1	0	1	0	0	117	0	0	1	1	1
1	1	83	1	0	1	2	3	2	5	172	64	21.6	0	0	2	0	0	0	1	2	1	7	1	6	0	0	124	0	0	NA	0	0
0	1	53	0	0	0	0	0	4	5	163	57	21.5	1	1	1	0	0	0	1	0.3	0	1	0	4	0	0	70	0	0	0	1	NA
0	1	72	0	0	0	0	0	1	4	157	53	21.5	1	0	3	0	0	1	1	0.7	0	2	0	1	0	0	111	NA	NA	NA	1	1
1	1	63	1	0	1	2	1	1	5	165	58	21.3	1	1	2	0	0	0	1	1.2	1	3	1	3	0	0	73	0	0	1	0	1
0	1	79	0	0	0	0	0	4	5	162	56	21.3	0	1	3	2	1	1	1	0.8	0	2	0	4	1	0	15	0	0	NA	1	NA
0	1	73	0	0	0	0	0	0	5	165	58	21.3	0	0	4	0	0	1	0	0	NA	0	NA	0	0	0	82	NA	NA	NA	1	1
0	1	43	0	0	0	0	0	0	5	174	64	21.1	0	0	1	0	0	0	0	0	NA	0	NA	0	0	0	105	0	0	0	0	1
0	2	47	0	0	0	0	0	0	4	157	52	21.1	0	0	3	1	0	1	0	0	NA	0	NA	0	0	0	142	0	0	0	0	0
0	2	77	0	0	0	0	0	0	5	157	52	21.1	0	0	2	1	0	0	0	0	NA	0	NA	0	0	0	125	0	0	NA	0	0
1	1	43	1	1	1	2	1	2	4	172	62	21	1	0	3	1	0	1	1	2.7	1	3	1	4	0	0	14	NA	NA	NA	0	NA
1	1	65	1	0	1	2	3	2	5	165	57	20.9	0	0	3	1	0	1	1	1	1	8	1	6(1)	0	0	33	0	0	0	1	NA
0	1	68	0	0	0	0	0	4	5	161	54	20.8	0	0	3	1	0	1	1	0.7	0	2	0	4	0	0	104	0	0	0	1	0
0	1	71	0	0	0	0	0	0	4	163	55	20.7	0	0	2	1	0	0	0	0	NA	0	NA	0	0	0	136	1	0.8	0	1	1
1	2	71	1	0	1	2	1	2	1	157	50	20.3	0	0	4	1	0	1	1	0.4	0	2	0	5	0	0	101	0	0	1	0	NA
0	1	68	0	0	0	0	0	0	5	168	57	20.2	1	0	3	0	0	1	0	0	NA	0	NA	0	0	0	80	0	0	0	0	0
1	1	53	1	0	1	2	1	1	3	163	53	19.9	0	0	2	0	0	0	1	0.5	0	1	0	4	0	0	117	0	0	0	1	1
0	1	77	0	0	0	0	0	0	5	167	55	19.7	1	1	3	1	0	1	0	0	NA	0	NA	0	0	0	25	99	NA	NA	0	NA
0	2	44	0	0	0	0	0	0	2	168	55	19.5	0	1	3	1	1	1	0	0	NA	0	NA	0	0	0	95	0	0	0	0	0
0	2	45	0	0	0	0	0	0	4	159	49	19.4	0	1	3	1	0	1	0	0	NA	0	NA	0	0	0	115	0	0	0	0	1
0	2	44	0	0	0	0	0	0	5	156	47	19.3	1	1	2	1	0	0	0	0	NA	0	NA	0	0	0	116	0	0	1	1	0
0	1	67	0	0	0	0	0	0	5	171	56	19.2	1	1	3	0	0	1	0	0	NA	0	NA	0	0	0	26	0	0	0	1	NA
0	2	40	0	0	0	0	0	0	4	165	52	19.1	0	0	2	0	0	0	0	0	NA	0	NA	0	0	0	123	0	0	0	0	NA
0	1	57	0	0	0	0	0	0	1	160	49	19.1	1	1	2	0	0	0	0	0	NA	0	NA	0	0	0	61	0	0	0	1	0
0	2	51	0	0	0	0	0	0	5	150	43	19.1	0	0	3	0	0	1	0	0	NA	0	NA	0	0	0	47	0	0	NA	0	0
0	1	53	0	0	0	0	0	0	5	170	55	19	0	0	4	0	0	1	0	0	NA	0	NA	0	0	0	81	0	0	0	0	NA
0	2	50	0	0	0	0	0	0	5	154	45	19	0	0	2	1	0	0	0	0	NA	0	NA	0	0	1	92	0	0	NA	0	1
1	1	74	1	0	1	2	1	0	4	162	49	18.7	1	0	3	0	0	1	0	0	NA	0	NA	0	0	0	1	NA	NA	NA	0	NA
0	1	71	0	0	0	0	0	5	5	165	51	18.7	0	0	1	0	0	0	1	0.2	0	1	0	5	0	0	61	0	0	0	1	1
0	2	77	0	0	0	0	0	0	1	150	42.1	18.7	1	0	3	1	0	1	0	0	NA	0	NA	0	0	1	101	0	0	NA	0	0
0	1	64	0	0	0	0	0	4	1	169	53	18.6	0	0	1	0	0	0	1	1.4	1	4	1	4	0	0	48	0	0	0	0	0
1	2	66	1	1	0	1	1	0	1	159	45	17.8	0	0	3	0	0	1	0	0	NA	0	NA	0	0	0	116	0	0	0	0	0
0	2	70	0	0	0	0	0	2	5	166	49	17.8	0	0	3	0	0	1	1	1	1	4	1	2	0	0	84	0	0	0	1	0
0	1	74	0	0	0	0	0	0	5	163	41	15.4	0	0	2	1	0	0	0	0	NA	0	NA	0	0	0	32	0	0	NA	0	NA
